# Supplementary material
Source: PubMed Central journal article supplement (PMC5955000)
Supplement: NIHMS963031-supplement-Supplemental.pdf [file NIHMS963031-supplement-Supplemental.pdf]

## Knock-in construct

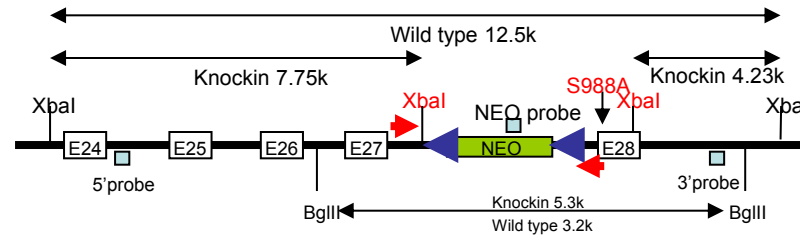

## Southern blot

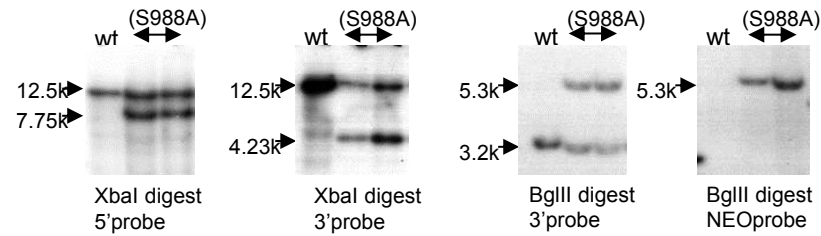

**A**

|                  | WBC<br>(10 <sup>3</sup> /μL) | Neut<br>(%) | Lymphs<br>(%) | Monos<br>(%) | Eos<br>(%) | Baso<br>(%) | Platelet<br>(10 <sup>3</sup> /μL) | RBC<br>(10 <sup>6</sup> /μL) | HgB<br>(g/dL) | HCT<br>(%) | MCV<br>(fL) | MCH<br>(pg) | MCHC<br>(g/dL) |
|------------------|------------------------------|-------------|---------------|--------------|------------|-------------|-----------------------------------|------------------------------|---------------|------------|-------------|-------------|----------------|
| <b>α4(S988A)</b> | <b>10.3</b>                  | <b>29</b>   | <b>68</b>     | <b>3.6</b>   | <b>0.1</b> | <b>0.04</b> | <b>1021</b>                       | <b>10</b>                    | <b>17</b>     | <b>44</b>  | <b>43</b>   | <b>17</b>   | <b>39</b>      |
| Std. Dev.        | 0.25                         | 7.3         | 7.3           | 0.29         | 0.11       | 0.04        | 25                                | 0.17                         | 0.49          | 0.51       | 0.66        | 0.38        | 0.8            |
| <b>α4 (wt)</b>   | <b>10.1</b>                  | <b>20</b>   | <b>75</b>     | <b>4.3</b>   | <b>0.1</b> | <b>0.02</b> | <b>982</b>                        | <b>9.5</b>                   | <b>17</b>     | <b>44</b>  | <b>46</b>   | <b>18</b>   | <b>39</b>      |
| Std. Dev.        | 0.17                         | 4.2         | 4.3           | 0.73         | 0.06       | 0.03        | 78                                | 0.16                         | 0.82          | 0.86       | 0.53        | 0.59        | 1.4            |
| p-value          | 0.28                         | 0.095       | 0.12          | 0.11         | 0.92       | 0.56        | 0.37                              | 0.001                        | 0.49          | 0.48       | 0.001       | 0.04        | 0.60           |

**B**

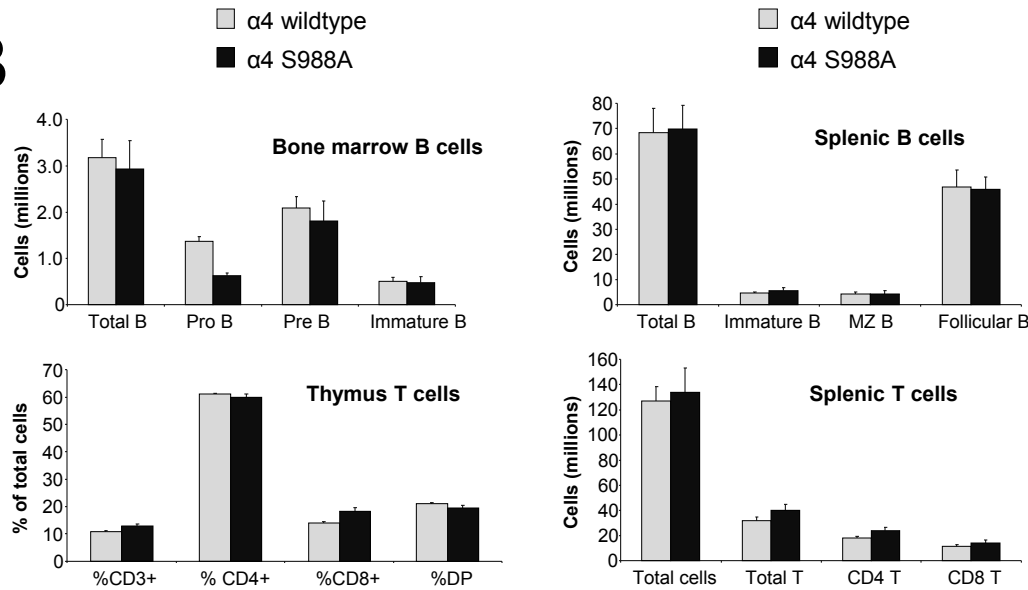

**C**

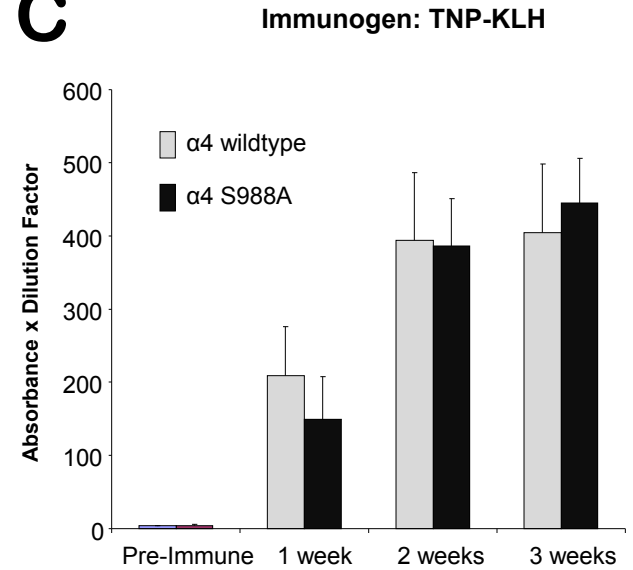

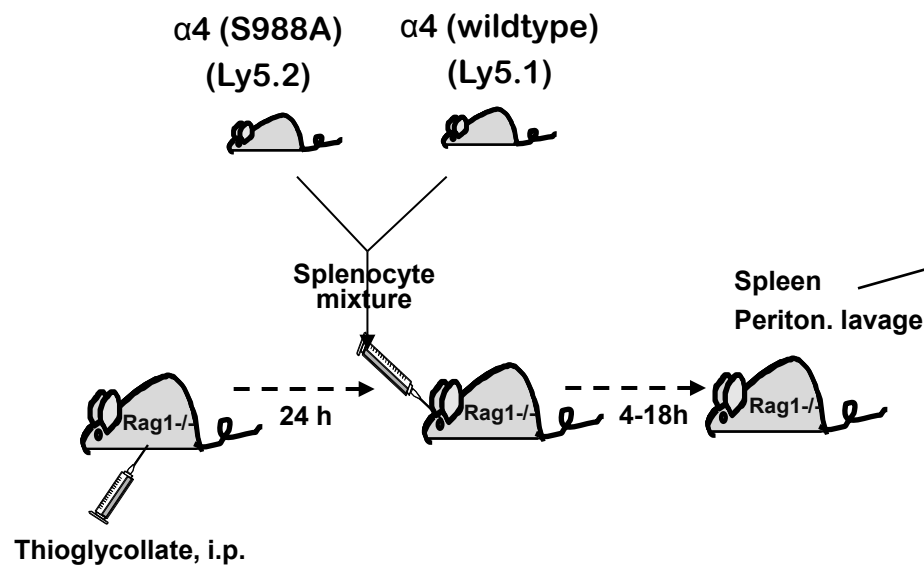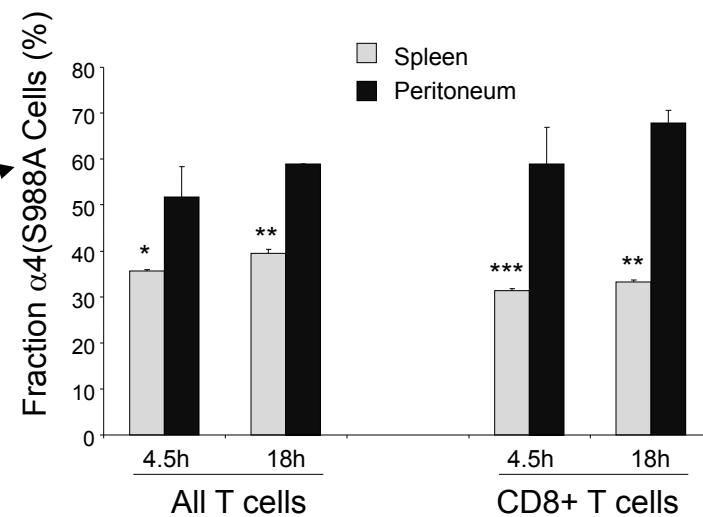

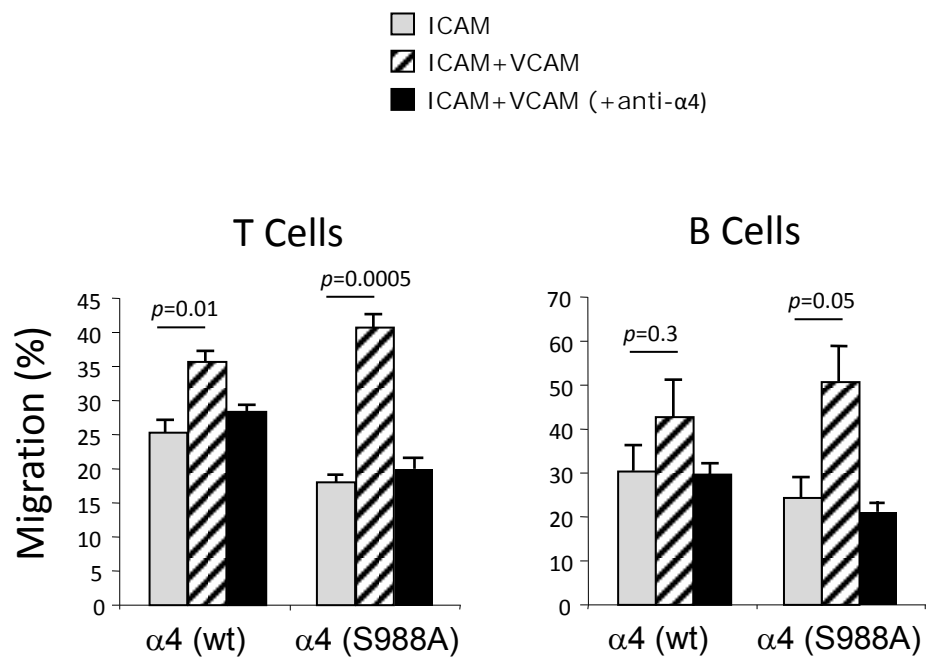

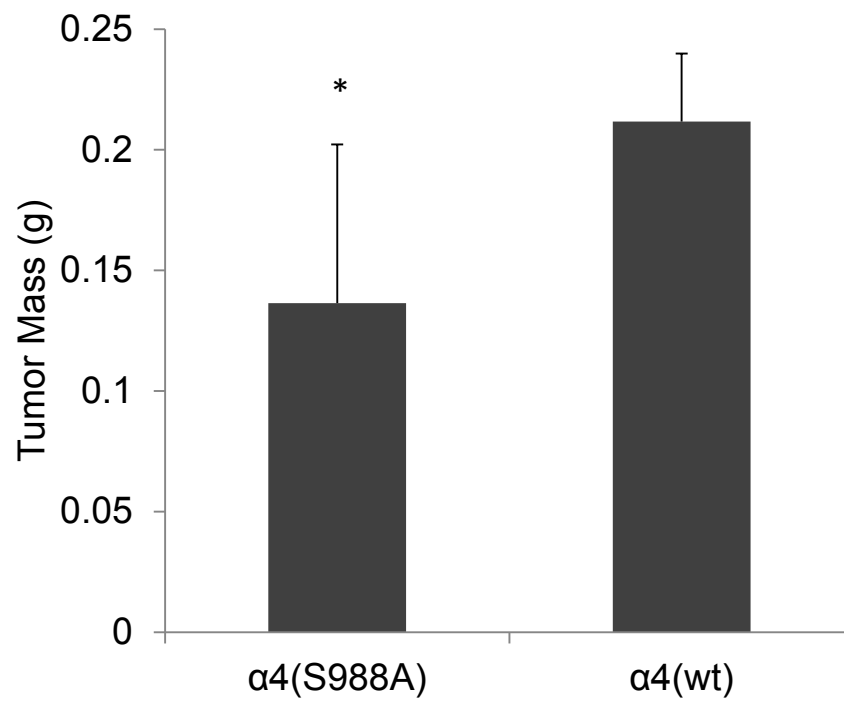

**A**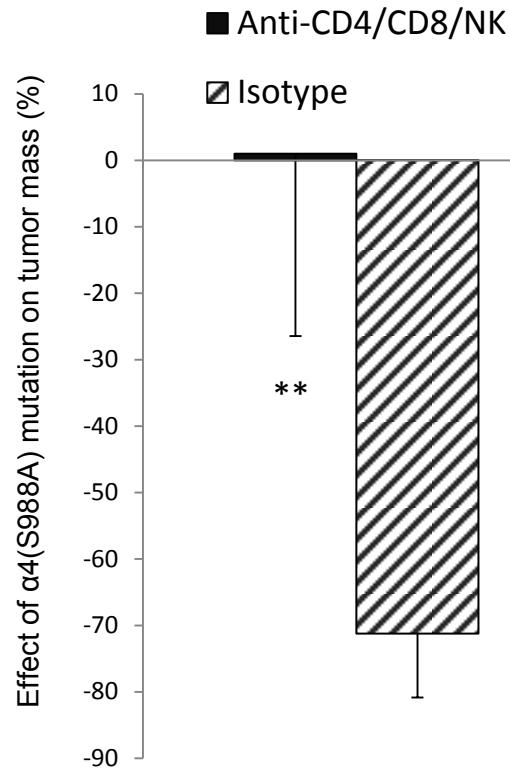**B**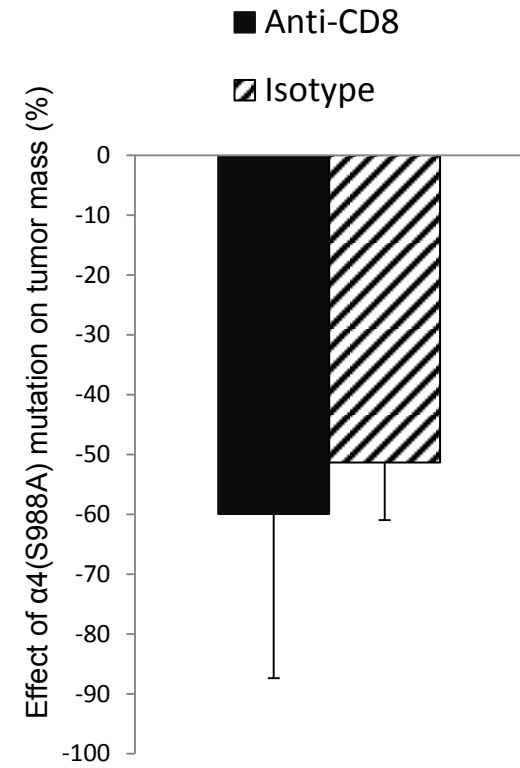

Depletion efficiency

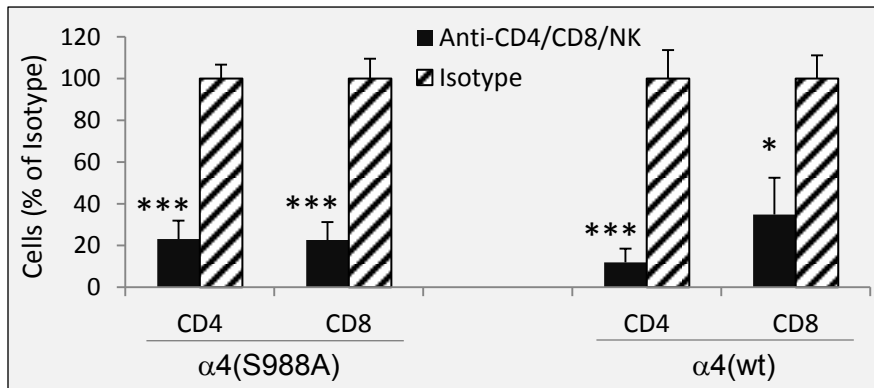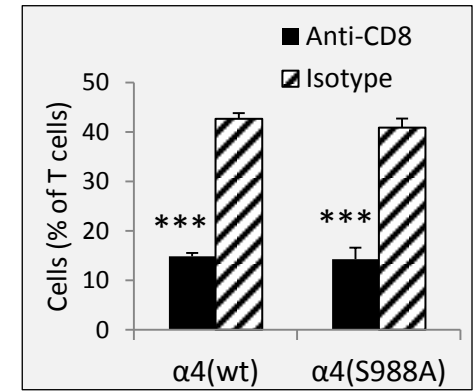

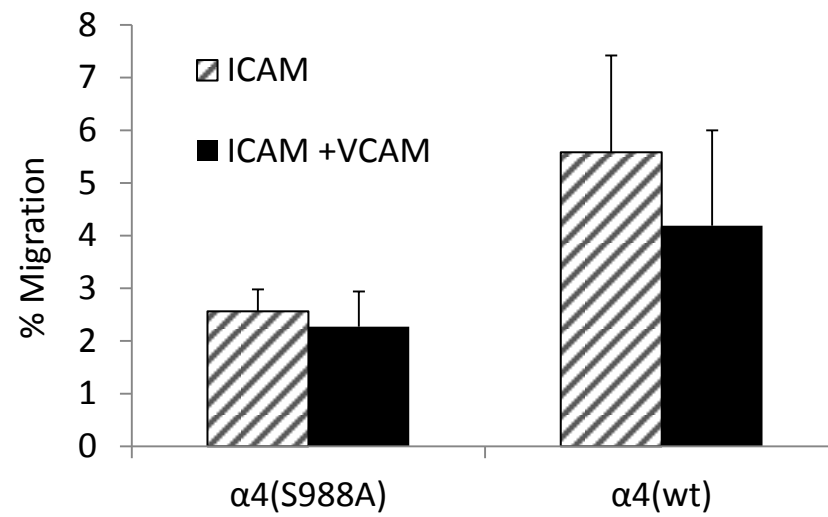

## Supplemental Figure Legends

**Supplemental Figure 1** *Generation of the  $\alpha 4$ (S988A) mouse.* A DNA fragment encoding  $\alpha 4$ (S988A) integrin with a Neomycin resistance gene was transfected into ES cells. ES clones heterozygous for knock-in were confirmed by treatment of restriction-digested DNA with P32-labeled DNA probes specific for 3' or 5' flanking sequences or neomycin resistance cassette. One  $\alpha 4$ (wt) sample is compared with DNA from two  $\alpha 4$ (S988A) ES clones. **(B)** *Hematological analysis.* Error bars are S.E.M. of n=5 for each group. **(C)** *Selectively increased lymphocyte migration in  $\alpha 4$ (S988A) mice.*

**Supplemental Figure 2.** **(A)** *Hematological analysis.* Blood was collected from adult (>9 weeks)  $\alpha 4$ (S988A) or control  $\alpha 4$ (wt) mice and analyzed by an automated cell counter and manual differential cell counting of stained smears. Error bars are S.E.M. of n=4 mice for each group. Two parameters (RBC and MCV) were statistically significant different, but fell within normal ranges for BL6 mice. **(B)** *Naïve lymphoid organ lymphocyte subsets.* Bone marrow, thymus, and spleen were isolated from adult (>9 weeks)  $\alpha 4$ (S988A) or control  $\alpha 4$ (wt) mice, made into single-cell suspensions, treated with RBC lysis buffer, and counted. Bone marrow cells were stained with combinations of antibodies for the following B cell subsets and analyzed by flow cytometry: Total B (B220+), Pro-B (CD43+ B220+), Pre-B (B220+ IgM- IgD-), and Immature B (B220+IgM+IgD-). Likewise, thymocytes were stained for T-cell subsets: Total T-cells (CD3+), CD4 SP (CD3+CD4+CD8-), CD8 SP (CD3+CD8+CD4-), and DP (CD4+CD8+). Splenic T and B cells subsets were identified as: Total B (B220+), Immature B (CD21/35-CD23-), Marginal Zone (MZ) B (CD21/35hi CD23-), Follicular B (CD23+ CD21/35lo), Total T (CD3+), CD4 T (CD3+CD4+CD8-), and CD8 T (CD3+CD8+CD4-). **(C)** *Humoral immune response.* Adult  $\alpha 4$ (S988A) or control  $\alpha 4$ (wt) mice were immunized i.p. with 100  $\mu$ g Trinitrophenol-Keyhole Limpet Hemocyanin (TNP-KLH) emulsified in Complete Freund's Adjuvant (CFA). Plasma from pre-immune and weeks 1, 2, and 3 bleeds were tested by direct specific ELISA for the presence of anti-TNP IgG. Similar results were seen with anti-IgM responses. Error bars are S.E.M. of n=4 for each group

**Supplemental Figure 3.** *Intrinsic homing advantage of  $\alpha 4$ (S988A) splenocytes.* Splenocytes from  $\alpha 4$ (S988A) or control  $\alpha 4$ (wt) Ly5.1 congenic mice were mixed and injected i.v. into *Rag1*<sup>-/-</sup> mice that had been challenged 24h earlier with 1ml thioglycollate medium. Mice were sacrificed

at 4.5h or 18h after splenocyte transfer; peritoneal lavage and spleen were counted, stained with fluorochrome-conjugated antibodies, and analyzed by flow cytometry. The ratio of  $\alpha 4$ (S988A) to control  $\alpha 4$ (wt) splenocytes was determined by measuring the ratio of Ly5.1-negative to Ly5.1-positive T-cells (CD3+). Error bars indicate SEM from n=3 (4.5h) and n=2 (18h) mice per group. \* $p$ < 0.02, \*\* $p$ <0.01, \*\*\* $p$ <0.04 (one-tailed t-test)

**Supplemental Figure 4.** Migration of  $\alpha 4$ (S988A) lymphocytes in vitro. B and T-cells were purified from spleens of  $\alpha 4$ (S988A) or control  $\alpha 4$ (wt) mice. Chemotactic migration towards SDF-1 $\alpha$  (15ng/ml) was assessed using a modified Boyden Chamber assay in wells coated with ICAM-1 (5  $\mu$ g/ml) +/- VCAM-1 (0.02  $\mu$ g/ml). For anti-integrin antibody blocking, cells were treated with 10 $\mu$ g/ml of anti- $\alpha 4$  or integrin prior to the assay. Error bars are S.E.M. of n=4 for each group

**Supplemental Figure 5.** Lewis Lung Carcinoma Tumor Growth. Lewis Lung Carcinoma (LLC) tumor cells (1x10<sup>6</sup>) were injected subcutaneously in the hind flank of  $\alpha 4$ (S988A) or control  $\alpha 4$ (wt) mice. On day 15, mice were sacrificed and tumors weighed. Error bars are S.E.M. from 10-11 mice per group. \* $p$ <0.02 (one-tailed Mann-Whitney test). Similar results were obtained with inoculation of 5x10<sup>6</sup> tumor cells.

**Supplemental Figure 6.** Tumor growth after depletion of lymphoid cells in  $\alpha 4$ (S988A) mice. B16 tumors were grown in  $\alpha 4$ (S988A) or control  $\alpha 4$ (wt) mice as in Figure 3. Two days before and 5 days after tumor cell inoculation, anti-CD8 (**A**), or a combination of anti-CD4, anti-CD8, and anti-NK1.1 (**B**) depleting antibodies were injected i.p. On day 15, excised tumors were weighed and compared between  $\alpha 4$ (S988A) and control  $\alpha 4$ (wt) genotypes in depleted or in antibody isotype-treated mice. Upper bar graphs show percentage change in tumor mass in  $\alpha 4$ (S988A) vs.  $\alpha 4$ (wt) mice. Lower graphs are depletion efficiency of T cells in the spleen on day 15. n  $\geq$  5 mice per group. \* $p$ <0.03, \*\* $p$ <0.015, \*\*\* $p$ <0.001 (one-tailed)

**Supplemental Figure 7.** Migration of  $\alpha 4$ (S988A) macrophages. Macrophages were differentiated from bone marrow of  $\alpha 4$ (S988A) or control  $\alpha 4$ (wt) mice by culture for one week in 30% L929 supernatant medium. Chemotactic migration towards SDF-1 $\alpha$  and MCP-1 (15ng/ml each) was assessed using a modified Boyden Chamber assay in wells coated with VCAM-1 alone (2  $\mu$ g/ml), or ICAM-1 (5  $\mu$ g/ml) +/- VCAM-1 (0.02  $\mu$ g/ml). Bar graphs summarize migration from n= 3 mice per group; no integrin transregulation or migrational differences were observed.
